# Supplementary material for: OMI surface UV irradiance in the continental United States: quality assessment, trend analysis, and sampling issues
Source: Copernicus journal article supplement (doi:10.5194/acp-2018-720), 2018-09-03
Supplement: Supplementary file [file acp-2018-720-AC2-supplement.pdf]

We sincerely thank the editor and reviewers for taking the time to review our manuscript and providing constructive feedback to improve our manuscript. We have revised the manuscript accordingly by following the reviewers' suggestion. Below shown are the original comments from reviewers in black and our corresponding responses in blue.

### **Comments by RC2:**

The manuscript by Zhang et al. describes a comparison of erythemal dose rates (EDRs) measured by the space-borne Ozone Monitoring Instruments (OMI) and ground-based UVB1 pyranometers manufactured by Yankee Environmental Systems. The ground-based instruments are located in North America (30 sites in the U.S. plus one site in Canada) and are part of the UV-B Monitoring and Research Program (UVMRP) operated by the Colorado State University. This network is currently the largest ultraviolet (UV) radiation monitoring network operating in the U.S. and data from the network are therefore important for assessing the climatology of UV radiation in the U.S. A comprehensive comparison of the network's measurements with OMI observations has not been published to my knowledge. The subject of the paper is therefore relevant for Atmospheric Chemistry and Physics. Unfortunately, I have concerns that the measurements of the ground-based instruments have not been processed correctly (see General Comments below) and this issue has to be resolved before the manuscript can be considered for publication in ACP.

**Response:** We are very grateful for the reviewer's thoughtful and detailed comments to improve our manuscript. We have addressed this concern in the General Comments.

### **General Comments**

The manuscript compares ground- and satellite-based EDRs at the time of the satellite overpass and local solar noon. Figure 8 shows distributions of the ratio of measurements at noon and during the satellite overpass. For OMI data (Fig. 8a), the distribution is skewed towards values larger than one. This is the distribution that I would expect because OMI passes over the U.S. in the afternoon when the solar zenith angle (SZA) is larger than at noon. For days when atmospheric conditions stay constant between noon and the overpass, UV radiation is only controlled by the SZA and is therefore larger at noon than during the time of the overpass, resulting in a distribution like that shown in Fig. 8a. In contrast, the distribution of the ratio of noon and overpass measurements for ground-based data (Fig. 8b) is almost symmetric with a mean value of about 1. I find this result very surprising and it conflicts with my understanding of the radiative transfer at Earth's surface. I therefore suspect that the ground-based measurements were not processed correctly, and if so, this would have consequence for the majority of data presented in the manuscript. All affected data would have to be reprocessed. Over the U.S., the OMI overpass occurs approximately between 0 and 2 hours after local solar noon. Hence, the SZA at local solar noon is almost always smaller than at the time of the satellite overpass. UV radiation must therefore be larger, on average, at noon than at the time of the overpass. Of course, UV radiation at the surface during the overpass time may occasionally be larger than during noon, for example, if enhancement by scattered clouds occurs. However it is highly unlikely that atmospheric conditions (e.g. clouds, aerosols, ozone) change in a systematic way between noon and overpass, resulting, on average, in higher absorption at noon to compensate for the smaller SZA. For example, if clouds always had a larger optical depth at noon than at the overpass time, the effect could be explained. It is hardly possible that such a systematic cloud effect could occur for the majority of the 31 sites studied here. Hence, the symmetrical distribution centered at one (Fig. 8b) points to a problem in the data

analysis (perhaps the calculation of the time of local solar noon is incorrect), which must be resolved before the paper can be published.

Response: We thank the reviewer for raising the concern of Fig. 8b in the originally submitted manuscript and we double checked our procedure of processing the ground measured data. It turned out that in our analysis, the local solar noon was defined as the local noon hour that is more or less defined by human and is constant in a time zone of 15-degree-longitude wide over U.S. Since this definition is inconsistent with the OMI algorithm that defines the local solar noon based on the minimax of the local solar zenith angle, we have re-processed the data collocation based on the local solar zenith angle (instead of the local noon hour) to match the noon time estimates by OMI in the revised manuscript. We apologize for our mistakes in the initial analysis. We have recalculated the local solar noon time for each ground site, defined as when the solar zenith angle reaches the minimum during the day. Consequently, the local solar noon time at each of the 31 ground sites in the present manuscript varies with the day of the year. Hence, we have reprocessed all of the data used in the manuscript, reconducted the comparison and updated the manuscript accordingly. The results show that (1) overall, OMI noon-time EDR values are larger than overpass time, (b) the PDF of the ratio is normal and in average 22% of time noon-time values are smaller than OMI overpass time (based on collocated data from ground observations), presumably due to the change of atmospheric conditions, and (c) the correlation of the ratios between OMI and surface data is more reasonable.

My second “major” comment refers to the selection of results being presented. The paper features an abundance of statistical analysis parameters but not the information that most readers would be most interested to see, i.e., the mean bias and range between ground-based measurements and OMI at each site. I therefore propose to include either a new table or a figure with box-whisker plots, which would show for each site the median and average relative bias, the interquartile range, and the 5th and 95th percentile range, for small SZA (e.g., 0 - 50 degree) and large SZA (50 - 75 degree), and for noon and overpass data. Such box-whisker plots would be similar to the box-whiskers shown in Figure 11, and would show data for each of the 31 sites separately, but only for two SZA ranges (which I think is sufficient). Such statistics are much more useful than Taylor diagrams, which are hard to interpret, and separating the results per site would allow to better discuss regional differences in the deviation of ground-based and OMI data, along with their causes (e.g., elevation, proximity to pollution and aerosol sources, clouds, etc.). If a figure with box-whisker plots is chosen, those could be spread-out over two or three rows to be able to show enough detail. Box-whiskers are easier to visually take-in than a table, but a table has the advantage that the numbers are defined. Finally, I don't see much value in Figures 5 and 6 and these could be removed (see details below).

Response: We sincerely thank the reviewer for this comment to improve our manuscript. We have followed the recommendation to generate a panel of box-whisker plots (please see Fig S1. in the supplement). We have also added the relevant discussion in Sect. 4.3. In addition, we have re-arrange and combined some figures to make the results more easy to follow and clear; for example, the PDF analysis is now merged together in Figure 4.

The title of the paper should also mention the ground-based measurements. I propose: “Surface erythemal UV irradiance in the continental United States derived from ground-based and OMI observations: quality assessment, trend analysis, and sampling issues”.

Response: We appreciate the reviewer’s suggestion for this new title to better represent the current work and we have adopted it.

### Specific Comments

P1, L17: As mentioned above, I find the conclusion in the following paragraph very surprising and physically impossible

“In addition, the ratio of EDR between solar noon to overpass time is often (95% in frequency) larger than 1 from OMI products; in contrast, this ratio from ground observation is shown to be normally distributed around 1. This contrast suggests that the current OMI surface UV algorithm would not fully represent the real atmosphere with the assumption of a constant atmospheric profile between noon and satellite overpass times.”

The summary in the abstract needs to be revised once the issue of the surprising distribution of the ratio of noon and overpass ground-based data is resolved.

Response: We have updated the summary related to Fig 8 in the abstract.

P1, L21: Change “Both OMI Noon\_FS and ground peak EDR show a high frequency of occurrence of ~ 20 mW m<sup>-2</sup> over the period of 2005–2017. However, another high frequency of ~ 200 mW m<sup>-2</sup> occurs in OMI solar noon EDR while the ground peak values show the high frequency around 220 mW m<sup>-2</sup>, implying that the OMI solar noon time may not always represent the peak daily UV values.” to: “The distributions of the OMI Noon\_FS and the ground EDR were analyzed using data for the period 2005- 2017. Both distributions have local maxima at about 20 mW m<sup>-2</sup>. The overall maximum of the distribution is 200 mW m<sup>-2</sup> for the OMI and 220 mW m<sup>-2</sup> for the ground-based data.”

Response: Corrected.

P2, L35: The references of the two assessment reports (UNEP, 2007; WMO, 2010) are now fairly old and should be updated by references to the latest assessment reports (UNEP 2015 and WMO 2014).

Response: Corrected.

P2, L40: Bigelow et al., 1998; Sabburg et al., 2002; Levelt et al., 2006 is an odd collection of rather old papers. Perhaps some newer papers should be cited also.

Response: Thanks for the suggestion and we have added a few newer references.

L55: Explain acronyms UVMRP and USDA.

Response: Corrected.

L56: The Brewer network is also still active in the U.S., see <https://www.esrl.noaa.gov/gmd/grad/neubrew/> Please mention it!

Response: We have added this in the text.

L68: Also mention an example from South America, e.g., <http://dx.doi.org/10.1016/j.jphotobiol.2012.06.013>

Response: Thanks for the suggestion and we have added this reference.

L142: the standard definition for UV-B is 280-315 nm, not 280-320 nm.

Response: Thanks for the correction.

L146-147: For satellite validation, the uncertainty for  $SZA > 80^\circ$  is of lesser importance. What is the uncertainty for the SZA range applicable to OMI validation? (While the specification of deviations from measurements with the standard triad is interesting, the 2.8% specified here is not an uncertainty because measurements of the triad are not free from uncertainty.) Also, please specify the confidence interval of all uncertainty specifications.

Response: We thank the reviewer for asking this question related to the uncertainty of the ground observation data. We rewrote Sect 2.2 (Ground Observation data) with more information about the characterization and calibration of the ground observation data and the associated uncertainty levels.

L148: I don't understand what the authors want to emphasize with the sentence starting with "In spite of this," Do you mean that having small uncertainties is more important when quantifying geographical difference than for satellite validation? If my interpretation is correct, please explain why you think that is the case!

Response: We apologize for the confusion here. We did not mean having small uncertainties is more important when quantifying geographical difference than for satellite validation. We were trying to give an example to show the application of the data. We have removed these few sentences here and instead just focused on discussing the data calibration process and the uncertainty levels.

L175: I am not sure how to interpret "Correspondingly, the temporal mean of ground observation within Delta T is compared to the spatial mean of OMI data within D." As noted earlier, ground based data were aggregated into 3-minute averages. So there can only be 3 ground-based measurements in a +/- 5 min time period. Likewise, There are only one or two OMI measurements within 50 km from the ground site, based on the OMI pixel size discussed earlier. The sentence should be clarified.

Response: We have reorganized the sentence here to make it clear.

L180: Specify whether the number of data pairs refers to all sites or each individual site.

Response: The number of data pairs refers to all sites and we have specified this in the text.

L186-192: Please also provide the formulas for NSD and RMSD. In particular, I am not sure what the difference is between RMSE and RMSD. Equations would clarify this. It is also inconsistent to name the "normalized standard deviation" NSD but the "normalized root-mean-square difference" RMSD. It should be NRMSD. Replace "shown in x and y axis respectively" with "shown both on the x and y axis". Replace "shown as the radius from the expected point" with "shown as concentric circles around the point labeled "expected" in Fig. 3a and 3b.

Response: We apologize for the confusion. The RMSD should be a normalized quantity (please see Eq. (4)). It is the centered root-mean-square difference normalized by the standard deviation of the observational data.

L222:  $n$  was already defined as the total number of data points on line 203. Don't use the same symbol for different quantities!

Response: We have corrected this.

L243 and Fig. 2a, b: One would expect that ground-based and OMI measurements agree better at overpass time than noon. This is indeed the case (as described) for MB and RMSE. However, surprisingly, the regression line is closer to the (ideal) 1:1 relationship for Noon\_FS data compared to OP\_FS data. This observation should be mentioned in the text, and reasons should be given. Perhaps this observation is a result of errors in the processing of ground-based measurements discussed earlier.

Response: We thank the reviewer for the careful observation. The updated figure has shown that the comparison for OP\_FS shows better results than that of Noon\_FS regarding MB, RMSE, correlation and the slope as well.

Fig. 3 and associated text. I find it very strange that overpass data have a negative bias and noon data a positive one. This points again to a problem in the calculation of one (or both) of the datasets.

Response: Thanks for the good question and we have fixed this issue now. After reprocessing the data, both OMI overpass and local solar noon time comparison show overestimates with OMI overpass time data showing a better agreement with ground observation.

Figure 5 and associated text. While I understand how the figures were calculated, I don't understand why these distributions are important to show. The figures mix in data from all sites (with greatly different cloud and aerosol conditions) and seasons. The figure depends on many variables, which I can't decouple in my head when looking at these distributions, and therefore, I don't know what to learn from these distributions. While there are differences between the distributions for the ground and OMI measurements (which ideally shouldn't exist) I wouldn't be able to grasp from this figure what might have gone wrong with the UV retrieval from OMI data (assuming that the distribution for the ground-based data is correct). I would consider removing this figure and the text that goes with it.

Response: Thanks for the comment and thought. The motive that we show Fig 5 is to illustrate the surface EDR distribution from OMI and ground observations. Previous work by Wang and Christopher (2006) has shown that changes in SZA in a day would cause two peaks in the surface shortwave radiation, one in the morning and one in the late afternoon. Here, we are interested in the surface EDR distribution. The results show that both OMI and ground observations of EDR demonstrate a similar distribution that resembles a bi-lognormal distribution. Therefore, we hope to keep Figure 5 and Figure 6. Further, from a statistical point of view, the comparison of two datasets including bias and PDF is more robust than either alone.

Fig 6 and associated text. Again, I am not sure why this figure is important. I understand that it confirms that OMI surface EDR and ground-observed EDR were drawn from the same distribution, but is this confirmation

really important? What can be learned that is not already known from the correlation coefficient? Hence, I suggest to consider removing this figure also.

Response: Please see the comment above. The linear correlation coefficient is not a statistically robust neither robust nor resistant and certainly it doesn't suggest if the two variables are from the same PDF or not. See Wilks (2011, cited in the manuscript).

L286: define "peak UV", e.g., move or copy "peak refers to the highest dose rate found in a day at each site" from the caption of Fig. 7 to the text.

Response: We have fixed this.

Fig 7 compares two different quantities and it is therefore not surprising that there are differences. For example, the observation of clouds within the OMI pixel will always lead to a reduction of UV radiation because cloud modification factors are  $\leq 1$ . In contrast, ground-based measurements can be enhanced beyond the clear-sky value during broken cloud conditions. This is a well-known phenomenon, e.g., <http://doi.org/10.1038/371291a0>. It is therefore not surprising that the high-frequency band is at  $200 \text{ mW m}^{-2}$  for OMI Noon-FS data and  $220 \text{ mW m}^{-2}$  for "Ground Peak" data. Since it is the goal of the paper to validate OMI data, I see little value in comparing two different quantities and concluding that "OMI solar noon time EDR may not always represent the high peak value on a daily basis due to the varying atmospheric conditions." I suggest replacing the right panel of Fig. 7 with the distribution of Noon\_FS data from the ground based measurements.

Response: We thank the reviewer for the explanation of the effects of clouds on both OMI and ground observations. We agree that it helps to compare the same quantity and we have added the comparison with ground Noon\_FS (Fig 4). The reason we show the ground peak is to understand if the peak UV always happen at solar noon time. We show that peak UV PDF is different from noontime UV PDF, based solely on the ground-based observation.

L321-325. Results discussed here and in Figure 8 do not make sense to me. Please see my General Comment earlier. For these reasons, I also disagree with the conclusion: "This indicates that the current OMI surface UV algorithm would not fully represent the real atmosphere with the assumption of constant atmospheric conditions being made and could thus induce errors in estimating surface UV irradiances." I suspect a problem with the processing of ground-based data, not of OMI.

Having said this, I note that Bernhard et al. (2015) (see: <https://www.atmos-chem-phys.net/15/7391/2015/>) have reported a problem in the conversion from OMI overpass EDRs to EDRs at local solar noon by the OMI UV algorithm. They conclude "Additional analysis suggests that the pattern is likely due to a systematic error of up to  $\pm 0.5$  degree in the calculation of the local-noon SZA by the [OMI] algorithm. For a SZA of 80 degree, a 0.5 degree error in SZA results in a UVI error of about 8 %". The authors should look at this publication and determined whether this problem also affects their data. According to my judgment, the problem is of less importance for the data of the USDA network than for data from the high-latitude sites discussed by Bernhard et al. (2015) because SZAs at the time of the satellite overpass are much smaller at lower latitudes.

Response: We have replotted Fig 8 with the new data and update the text accordingly. Thanks for sharing the work of Bernhard et al. (2015) that discusses the SZA effects, we agree with the reviewer's judgement that the effects due to the calculation of SZA in the OMI algorithm.

L358: I believe that the larger noise in the bias at larger COT values has additional reasons than the one noted in the paper. For example, it is difficult from space to estimate the COT if the COT is large (e.g., > 10). In contrast, clouds with COT=100 attenuate UV radiation much more than those with COT=10.

Response: Yes, we agree with you. There could be additional reasons than the one discussed in the manuscript. We have revised the statement to make it not being biased.

Figure 13: It would be better to show trends per year or decade in percent instead of absolute values (in  $\text{mW m}^{-2} \text{ yr}^{-1}$ ). The significant trend in one tiny part of California is almost not worth mentioning in the text (L 372).

Response: Thanks for the suggestion. We have shown the trend in percentage per year now instead of absolute values. We also agree that it is not worthy mentioning the tiny part in California.

Figure 14a: Also this plot should be presented in percent. (If you decide to keep trends in absolute terms, the unit should be changed to that of spectral irradiance:  $\text{mW m}^{-2} \text{ nm}^{-1} \text{ yr}^{-1}$ .)

Response: Thanks for the suggestion and we have shown the trend in % per year now.

L377: I don't understand why Zhang et al. (2017) found a significant positive trends over the western U.S. using OMI AOD for 2005–2015 while such trend was not found by the same author in the present work. What is the difference? The fact that this study considers measurement between 2005 and 2017 instead of 2005 and 2015?

Response: After recalculating the trends for pixels with at least 20 days of data in a month, we indeed find OMI AOD show some significant trends (Fig S2 (a)) for some pixels in the Western and Central U.S., also found by (Zhang et al., 2017).

L380: Explain acronym "AAOD" I presume it means "absorption aerosol optical depth." Indicate that this parameter is part of the standard OMI data products. AAOD in the UV-B is very difficult to measure from space since most of the absorption is close to the ground. Indicate the uncertainty of OMI AAOD. Could the small AAOD trends (<0.003 per year) that are reported here be a result of drifts in OMI data?

Response: We have described the AAOD in the earlier Sect. 2.1 and we apologize for the many abbreviation and acronyms used in the current manuscript. We have modified Table 2 to better organize the abbreviation we have used in the current manuscript. We have recalculated the AAOD trend (Fig 8(f)) and in most parts, the trend is around 0.05 per year calculated as  $100 \times \text{AAOD}$  per year. According to the OMI Algorithm Theoretical Basis Document (ATBD) Volume III, the retrieval accuracy of OMI aerosol optical thickness algorithm is on the order of 30 %.

L387: Monthly averages can be greatly biased if only 10 days are available, in particular if measurements occur only at the beginning or end of a month. It would be best to repeat the trend analysis using only months with 20

or more days of data, and compare the results to ensure that trend estimates are robust and not driven by missing days.

Response: We agree that using 10 days could cause biases and we have recalculated the monthly average using only months with at least 20 days of data.

The conclusions need to be changed to reflect changes to the text resulting from my comments above. This applies in particular to lines 437-446 where the distributions of noon/overpass data are discussed.

Response: We have revised this part.

L454-459: The suggestion that trends in UV seen in the ground measurements are caused by trends in AAOD are highly speculative, and this should be stated. I believe that trends in AAOD derived from OMI measurements at 310 nm are rather uncertain. Furthermore, assessments of trends in AOD reported in the paper are only based on OMI (lines 377-379). The conclusions that there are no trends in AOD is premature because of the difficulty to probe the lower troposphere from space in the UV-B. It would be good to check whether the ground-based AERONET sunphotometer network has reported trends in AOD and AAOD for the period of the paper and to use those data to interpret trends in EDRs (although AERONET also does not have wavelengths in the UV-B).

Response: We find significant positive OMI AAOD trends in part of Wester and Central, which could possible affect some of the ground measurements in this region but further analysis would be needed to better understand the cause of the trends found from both ground measurements and OMI data. We agree that it is difficult to probe AOD in the UV-B, especially if the atmosphere is missed with dust and biomass burning aerosols, which make it challenging to study the AOD trend. We strive here to provide some first-order explanation but more detailed analysis would be needed to understand the causes of the surface UV trends. We found that there is no scientifically sound and coherent trends among OMI data for aerosols, clouds, and ozone that can explain the surface UV trends revealed either by OMI or ground-based estimates; nor these data can reconcile trend differences between the two estimates.

### Technical Corrections

General: It would be helpful to define acronyms for “overpass time EDR” and “local solar noon EDR” at the beginning and then use these acronyms in the text instead of repeating the same phrases.

P1, L13: Change “OMI data overall has ~4% underestimate for overpass EDR while ~8% overestimate for the solar noon time EDR” to “OMI underestimates the overpass EDR by about 4% on average and overestimates the solar noon time EDR by 8%.”

P1, L17: “with SZA” > “for SZA”

Response: Corrected.

P1, L20: “viability” > “variability”

Response: Corrected.

P1, L21: Explain “Noon\_FS”

L44: “in many locations” > “at many locations”



Response: Corrected.

L47: “In addition, the surface UV irradiance, denoted as ‘erythmal weighted’” > “In addition, the erythemally weighted irradiance” (spectral irradiance is also surface UV irradiance in this context!)

Response: Corrected.

L49: “the incoming solar radiation” > “the solar irradiance”; and “according to” > “with”

Response: Corrected.

L51: “derive UV index” > “derive the UV index”

Response: Corrected.

L52: “UV index” > “the UV index”

Response: Corrected.

L60: “has been” > “have been” (data is plural) L61: “the OMI data has” > “OMI data have”

Response: Corrected.

L64: “in many sites” > “at many sites”

Response: Corrected.

L100: “tables are the” > “tables is the”

Response: Corrected.

L119: “triangular slit function with full width half maximum” > “a triangular slit function with full width at half maximum”

Response: Corrected.

L177: delete “different”

Response: Corrected.

L187: “normalized room-mean-square” > “normalized root-mean-square” (not “room”!) L262 “larger” > “large”

Response: Corrected.

L364: “range principally controlled” > “range that is greatly affected”

Response: Corrected.

L366: “identified trend of surface EDR” > “trends in surface EDR”

Response: Corrected.

L388: “In contrast, ground observation shows” > “In contrast to trends derived from OMI data, ground observations show”

Response: Corrected.

L425: Explain acronyms “TEMPO and GEMS”

Response: Corrected.
